# Supplementary material for: Polo-like Kinase 4: A Multifaceted Marker Linking Tumor Aggressiveness and Unfavorable Prognosis, and Insights into Therapeutic Strategies
Source: MDPI journal article supplement (doi:10.3390/cancers15184663), 2023-09-21
Supplement: s1 [file s1]

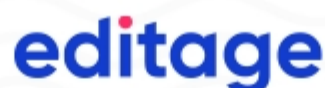

# Editing Certificate

This document certifies that the manuscript listed below has been edited to ensure language and grammar accuracy and is error free in these aspects. The logical presentation of ideas and the structure of the paper were also checked during the editing process. The edit was performed by professional editors at Editage, a brand of Cactus Communications. The author's core research ideas were not altered in any way during the editing process. The quality of the edit has been guaranteed, with the assumption that our suggested changes have been accepted and the text has not been further altered without the knowledge of our editors.

## MANUSCRIPT TITLE

**PLK4 : A Multifaceted Marker Linking Tumor Aggressiveness and Unfavorable Prognosis, and Insights into Therapeutic Strategies**

## AUTHORS

**Youngtaek Kim, Joon Yeon Hwang, Dong Kwon Kim, Kwangmin Na, Seul Lee, Sujeong Baek, Seong-san Kang, Seung Min Yang, Mi Hyun Kim, Heekyung Han, Chai Young Lee, Yu Jin Han, Min Hee Hong, Jii Bum Lee, Byoung Chul Cho, YoungJoon Park, Kyoung-Ho Pyo**

## ISSUED ON

**August 19, 2023**

## JOB CODE

**GHEKK\_1**

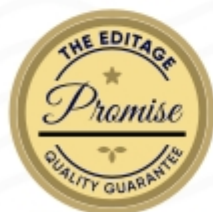

**Prabh Grewal**  
Vice President, Operations - Editage
